# Supplementary material
Source: PubMed Central journal article supplement (PMC4067560)
Supplement: mmc1.pdf [file mmc1.pdf]

The American Journal of Human Genetics, Volume 94

Supplemental Data

**Biallelic Variants in *TTLL5*, Encoding  
a Tubulin Glutamylase, Cause Retinal Dystrophy**

Panagiotis I. Sergouniotis, Christina Chakarova, Cian Murphy, Mirjana Becker, Eva Lenassi, Gavin Arno, Monkol Lek, Daniel G. MacArthur, UCL-Exomes Consortium, Shomi S. Bhattacharya, Anthony T. Moore, Graham E. Holder, Anthony G. Robson, Uwe Wolfrum, Andrew R. Webster, and Vincent Plagnol

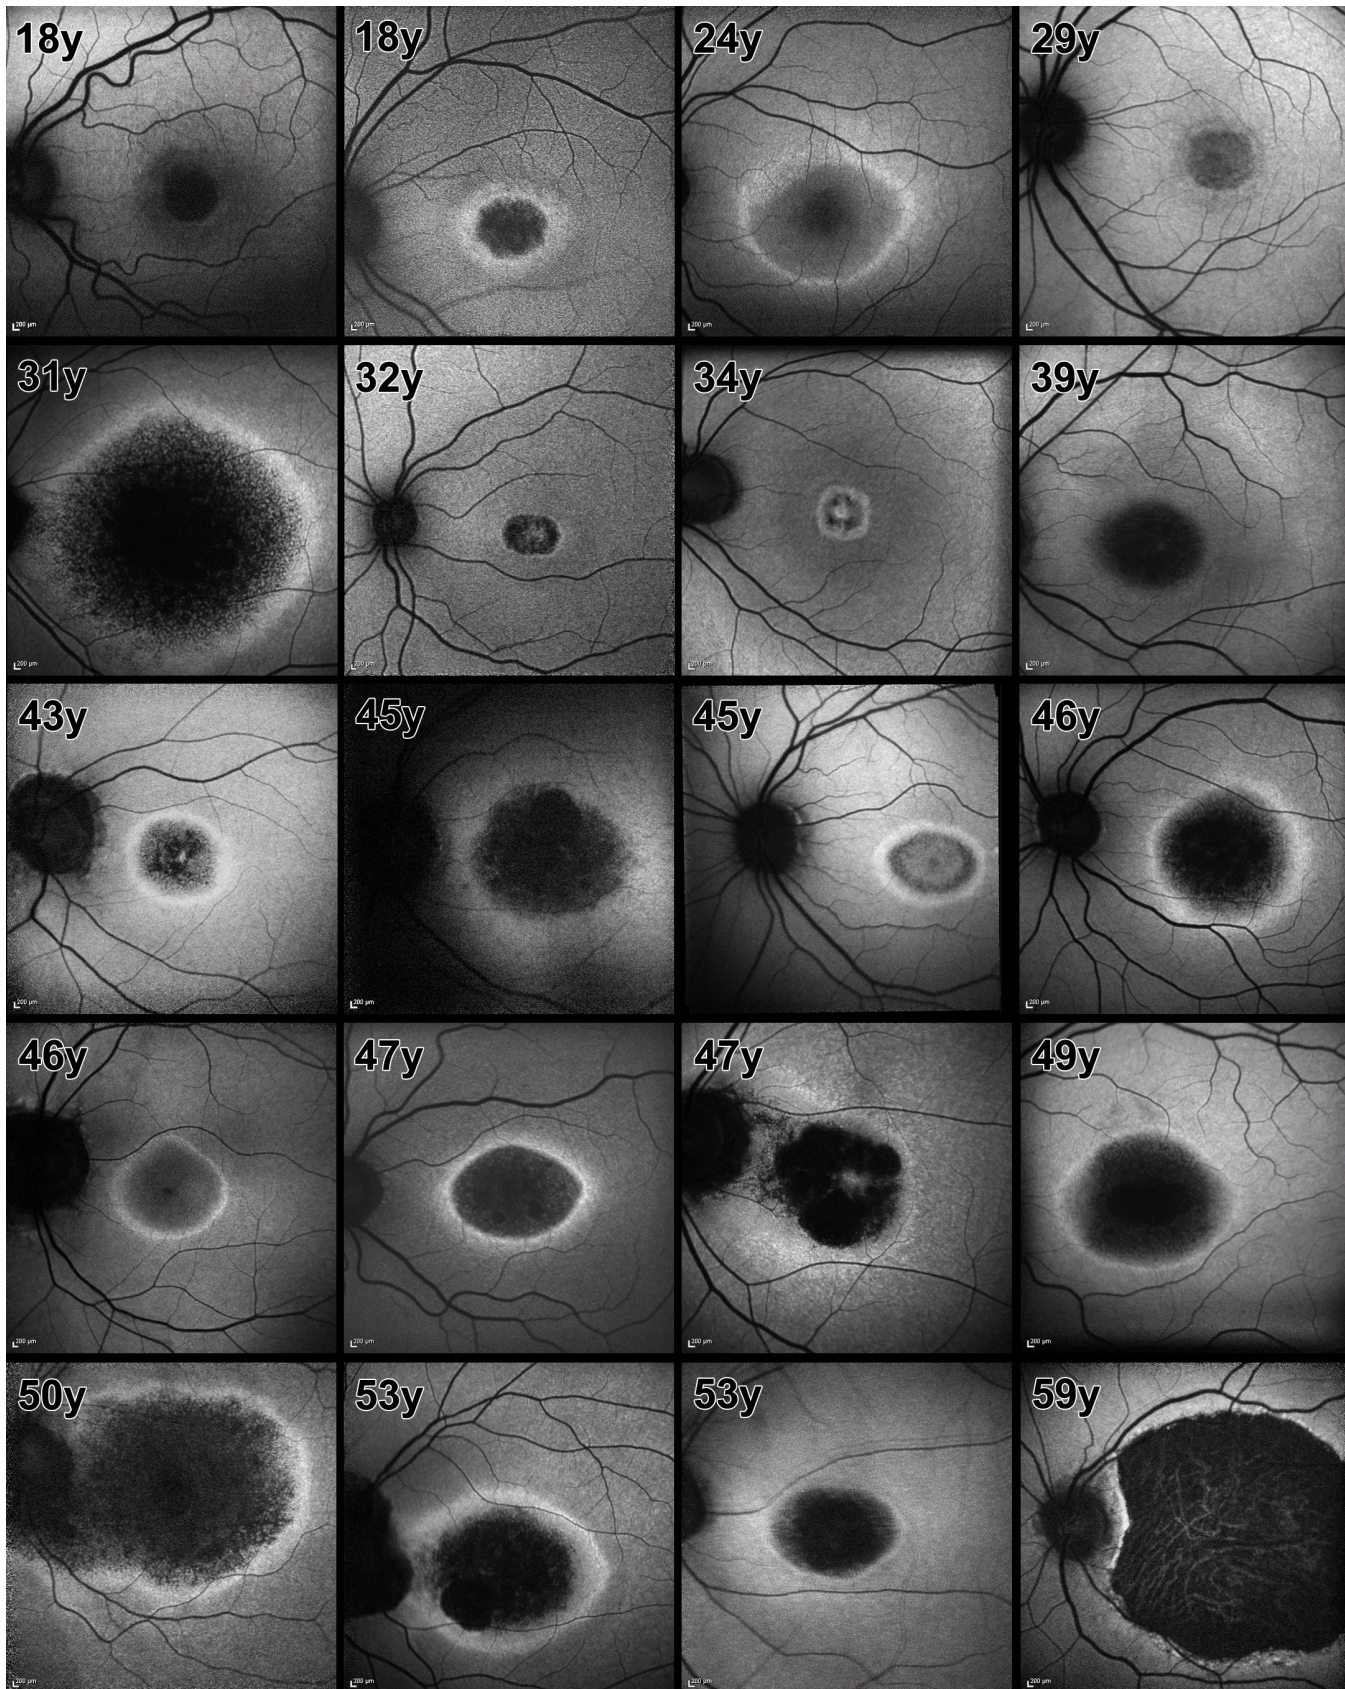

**Figure S1.** Fundus autofluorescence (FAF) images of 20 individuals with: [i] a retinal dystrophy with early cone photoreceptor involvement, [ii] no previous genetic testing or an unknown molecular diagnosis after previous genetic screening, [iii] absence of fundoscopic features suggestive of *ABCA4*-retinopathy (yellow-white flecks and/or peripapillary sparing). Exome sequencing was performed in all these as well as eight additional cases with a similar phenotype (including subjects CD1 and CD2). FAF imaging uses naturally occurring fluorescence to map metabolic changes at the level of the retinal pigment epithelium. The FAF pattern observed in these 20 individuals is not unlike that seen in retinopathy due to dominant mutations in *GUCY2D* [MIM \*600179], *PROM1* [MIM \*604365], *RIMS1* [MIM \*606629] and *CRX* [MIM \*602225], and recessive mutations in *KCNV2* [MIM \*607604]. Retinopathy due to mutations in *PRPH2* [MIM \*179605], *ABCA4* [MIM \*601691] and *RPGR* [MIM \*312610] should also be in the differential although the presentation would be atypical for these.

|            |                                                              |                               |    |
|------------|--------------------------------------------------------------|-------------------------------|----|
| Human      | MPIVMARDLEETASSEDEE-VISQED----                               | HPCIMWTGG-CRRIPVLVHADAILTKDN  | 54 |
| Mouse      | MPVVMARDLEETASSEDED-LANQED----                               | HPCIMWTGG-CRRIPVLVHAEAILTKDN  | 54 |
| Chicken    | -----MARGLEESGSSSEEEEEEDAGDGLLDHPCIRWTGGGCRRIPIFVHADAILTND   | 56                            |    |
| Lizard     | MPVGMARDLEETDSSSEEEEEVEGPE----                               | HPCITWTGG-FRRIPIILVHADAIITKDS | 55 |
| Pufferfish | -----LCSHRD----                                              | NPCVAWCGL-SRSIPVLLFFPEAAVSKDG | 34 |
| Frog       | ----MVPRGQQDEQSEEDDD--SKKGE----                              | YSCILWAGG-SRKVPIVMFHAEAVLHKNL | 49 |
|            | :                                                            | .*: * * * :*.:*.:* : ::       |    |
|            |                                                              |                               |    |
| Human      | NIRVIGERYHLSYKIVRTDSRLVRSILTAHGFHEVHPSSTDYNLMWTGSHLKPFLLR    | 114                           |    |
| Mouse      | NIRVIGERYHLSYKIVRTDSRLVRSILTAHGFHEVHPSSTDYNLMWTGSHLKPFLLR    | 114                           |    |
| Chicken    | YLRLIGERYHLSYKIVRTDSRLVRSILTAHGFHEVHPNSSDYNLMWTGSHLKPFLLR    | 116                           |    |
| Lizard     | YTRLIGERYRLAFKIVRTDSRLVRSILSAHGFREVHPSNEYNLMWTGSHLKPFLLR     | 115                           |    |
| Pufferfish | RISSTGERYHMAFKIVRTESRLVRGILANHGFRVHNSDFNLMWGSGLKPYMLRN       | 94                            |    |
| Frog       | SLRAVGERYKLSYKIVRTDSRLVRSILSAHGFQEVNANSDFNIMWTGSHVHPYIMR     | 109                           |    |
|            | ****:.:*****:*****.*.: ***:***: .*.:*.:***:***:***:***:***   |                               |    |
|            |                                                              |                               |    |
| Human      | EAQKVNHFPRSYELTRKDRLYKNIIRMQHTHGFKAFHILPQTFLLPAEYAEFCNSYSKDR | 174                           |    |
| Mouse      | EAQKVNHFPRSYELTRKDRLYKNIIRMQHTHGFKAFHILPQTFLLPAEYAEFCNSYSKDR | 174                           |    |
| Chicken    | DIQKVNHFPRSYELTRKDRLYKNVSRMQLSHGFKTFHILPQTFILPAEYQEFCS       | 176                           |    |
| Lizard     | DIQKVNHFPRSYELTRKDRLYKNIIRMQTYGFKSFHVLVLPQTFILPAEYQEFCS      | 175                           |    |
| Pufferfish | DFQKVNHFPRSYELTRKDRLYKNIQRMQQAHGFKDFHIVPQTFVLPYEQEFCS        | 154                           |    |
| Frog       | NFQKVNHFPRSYELTRKDRLYKNVSRMQLSHGFKNFHLLPQTYLLPAEYQDFCTAF     | 169                           |    |
|            | : *****:*****: ***: ***:***:***:***:***:***:***:***          |                               |    |
|            |                                                              |                               |    |
| Human      | GPWIVKPVASSRGRGVYLINPNQISLEENILVSRYINNPLIIDDFKFDVRLV         | 234                           |    |
| Mouse      | GPWIVKPVASSRGRGVYLINPNQISLEENILVSRYINNPLIIDDFKFDVRLV         | 234                           |    |
| Chicken    | GPWIVKPVASSRGRGVYLINPNQIVLEDNIVSRYINNPLIIDDFKFDVRLV          | 236                           |    |
| Lizard     | GPWIVKPVASSRGRGVYLINSPNQISLEENILVSRYINNPLIIDDFKFDVRLV        | 235                           |    |
| Pufferfish | GPWIIKPVASSRGRGIYLVSNPTQISVDDNIVSRYINNPLIIDDFKFDVRLV         | 214                           |    |
| Frog       | GPWIVKPVASSRGRGVYLINSPSLISMEDNIVSRYIGNPLIIDDFKFDVRLV         | 229                           |    |
|            | ****:*****:***:..*.* :.:*****.****** *****:****              |                               |    |
|            |                                                              |                               |    |
| Human      | PLVIYLYEEGLARFATVRYDQGAKNIRNQFMHLTNYSVNKKSGDYVSCDDPEVEDYGN   | 294                           |    |
| Mouse      | PLVIYLYEEGLARFATVRYDQGSKNIRNQFMHLTNYSVNKKSGDYVSCDDPEVEDYGN   | 294                           |    |
| Chicken    | PLVIYLYEEGLARFATVRYDQASKNIRNQFMHLTNYSVNKKSGDYVSCDDPEVEDYGN   | 296                           |    |
| Lizard     | PLLVYLYEEGLARFATVRYDQGAKNIRNQFMHLTNYSVNKKSGDYVSCDDPEVEDYGN   | 295                           |    |
| Pufferfish | PLLIYVYEEGLARFATVRYDQTSKNIKNTFMHLTNYSVNKKSSDYVSCDDPEVEDYGN   | 274                           |    |
| Frog       | PLVIYLYEEGLTRFATAKYDRAAKNIRNQFMHLTNYSVNKKSGDYVSCDDPDVEDYGN   | 289                           |    |
|            | **.:*.:*****:***:.*.: ***:.* *****.******.******             |                               |    |
|            |                                                              |                               |    |
| Human      | SMSAMRLRYLKQEGRDTTALMAHVEDLI IKTI ISAE LAIATACTFVPHRSSCFELYG | 354                           |    |
| Mouse      | SMSAMRLRYLKQEGKDTTALMAHVEDLI IKTI ISAE LAIATACTFVPHRSSCFELYG | 354                           |    |
| Chicken    | SMSAMRLRYLKQEGRDTAALMASVEDLI IKTVSAE LAIATACTFVPHRSGCFELYG   | 356                           |    |
| Lizard     | SMSAMRLRYLKQEGKDTTALMASVEDLI IKTILSAE LAIASACKAFVPHRGVCFELYG | 355                           |    |
| Pufferfish | SMSAVLRYLKQEGKDTTLLMRQVEDLI IKAIMGAEQQIATACTFVPHKTNCFELYG    | 334                           |    |
| Frog       | SMSAMRLRYLKQDGKDTAALMSQVEDLI IKTIVSAELPIASACKSLITHRGNCFGMR   | 349                           |    |
|            | ****:*****:***: ** *****:..*.* ***:***:***:***:***:***       |                               |    |
|            |                                                              |                               |    |
| Human      | LIDSTLKPWLLEVNLS-----PSLACDAPLDLKIKASMISDMFTVVG              | 409                           |    |
| Mouse      | LIDNTLKPWLLEVNLS-----PSLACDAPLDLKIKASMISDMFTVVG              | 409                           |    |
| Chicken    | LIDDTLKPWLLEVNLS-----PSLACDAPLDLKIKASMLSDMFTLVGFVCQDP        | 410                           |    |
| Lizard     | LIDSTLKPWLLEVNLS-----PSLACDAP-DLKIKASMISDMFTLVGFVCQDP        | 408                           |    |
| Pufferfish | LIDANLKPWLLEVNLS-----PSLACDAPLDLKIKASMIADMFTLVGFVCQDP        | 388                           |    |
| Frog       | CLRGVLRPTMLTIFQIFEGIPSLYIDAPLDLKVKASMISDMFTLVGVECQDP         | 407                           |    |
|            | : **:* :* : :. *** ***:***:***:***:***:***:***:***           |                               |    |
|            |                                                              |                               |    |
| Human      | PIYPTFESSRRNPFQKQOR-----CRPLSASDAEMKNLVGSAREKGPGLG           | 455                           |    |
| Mouse      | SIYPSFESSRRNPFQKQOR-----TRPLSASDAEMKNLVASAREKVPGLG           | 455                           |    |
| Chicken    | TVYHSSESVRRNPFQKQORPASAQSQPTNTRMTRPLSASDVEMKNLMSSGREKATGR    | 470                           |    |
| Lizard     | TSFYSS-EARRNPFQKQORPVSAQSRSSTNAKLSRPLSASDAEMKNLMSSAKEKIPGR   | 467                           |    |
| Pufferfish | SERVTLPSLKHAAQRTQ-----VLERPLSEPTAAKNGRVAGSKDKLAVKQ-          | 435                           |    |
| Frog       | ---RASSSLYDKRTQKSTH-----QRPLSANDIDT-GLQVGNREK-AVRRT          | 448                           |    |
|            | : : : : ***** . . :.* . :                                    |                               |    |

Human GSVLGLSMEEIKVLRVKEENDRRGGFIRIFPTSETWEIYGSYLEHKTSMNYMLATRLFQ 515  
Mouse GSVLGLSMEEIKVLRVKEENDRRGGFIRIFPTSETWEIYGSYLEHKTSMNYMLATRLFQ 515  
Chicken SSVLGLSMEEIKVLRVVDENERRGGFIRIFPTPLTWDLYGSFLEYKTSMNYMLATRLFQ 530  
Lizard GSMLGLSMEEIKVLRVKEDEYERRGGFIRIFPTPIITWDYGSFLEHKTTMNYMLATRLFQ 527  
Pufferfish ESTLSLTAAEIKVLRRIQEEYERRGGFIRIFPTAETWELYGEYLESKTSMNYTVANRLFH 495  
Frog SCLLGLSIEELKILRRVQDEYERRGGFVRIFFRHNTWQLYGSFLEYKTSLNMYMLVTHLFP 508  
. \*.\*: \*\*:\*:\*\*\*::\* :\*\*\*\*\*:\*\*\*\* \*\*: \*\*.:\*\* \*\*::\*\* :...:\*\*

Human DR-----MTADGAPELKIESLNSKAKLHAALYERKLLSLEVRKRRRRSSRLR 562  
Mouse DRGNPRRSLLTGRARVSTEGAPELKVESMNSKAKLHAALYERKLLSLEVRKRRRRSGRLR 575  
Chicken DRDKMKGDLITG----RSRELDLGRDLTNLEAVDSSHSLFYERKLVSLERKRRRCRTKAR 586  
Lizard DPCNAE-----PSRE-LG--LDVVCNAQLHAALYERKLLSLEVRKRRRRRHGKLR 574  
Pufferfish GRLGMGNKSLHK--FMERGNVSGNVQLQVESFHDCHVIQYERKLLTLETHKRRRRHRLTSR 553  
Frog NR-----AAGNDHCEKNWDPRMHAAFYERKLVSLHLR--RARHRLTR 549  
. \* \*\*\*\*\*:\*. : \* \* \*

Human AMRPKYPVITQPAEMNVKTETESEEEEEVALDNEDEEQEASQEEASAGFLRENQAKYTPSL 622  
Mouse AMRPKYPVIAQPAEMNIKTETESEEEEEVGLDNDDEEQEASQEEASAGSLGENQAKYTPSL 635  
Chicken AAQTRSSGTSQPTKLSLT-DTEGEEEEEAAD--EDEE----QDGTGLSLSNSQLKSKPKL 639  
Lizard PRRSRLSGALQSTDFALKSEMECEEEEEETTE--EDEEPEIPQNETADCLKNMKVKSKPQL 632  
Pufferfish SAAGKRK-SGSSQNLFOKCLSESKTSLTSLG-----SQEAEECAQEEREVEKAVL 602  
Frog KTGLSHAPQCSDEHQSSKEQEEEEEELDEN-----HEL 584  
. . . \* : \*

Human TALVENTPKENSM-KVREWNNKGGHCCKLETQELEPK-----FNLMQIQLDNGNLSKMQA 676  
Mouse TVIVENSPRDNAM-KVAEWTNKGEPCCKIEAQEPESK-----FNLMQIQLDNGNLSKVQA 689  
Chicken SELVKTASKERLT-EKLDKKTTRNGGEPFLEKSDSKSQ-----FNLLQILKKGDNLSKVQA 693  
Lizard SEQVEPSHQGKLTKNQLEQKPKSEELPCESKLDTVPKSVLFPNLLQVLHENKNLSKVQA 692  
Pufferfish EPLSKRALEAELS-KQMAASLKRCQAEALSSSEAAAHNGGHKVSLLDVLQQGWDLSKVQA 661  
Frog EVVQEKVSSPDSS-KI I I P P P R-----ISLMDILRKGADLSKVQA 623  
: : : ..\*::\*... :\*\*\*:\*\*

Human RIAFSAYLQHVQIRLMKDSGGQTFASWAAKEDEQMELVVRFLKRASNNLQHSRLMVLPS 736  
Mouse RLAFSAYLQHVQIRLTKDSGGQTLSPSWAAKEDEQMELVVRFLKRASNNLQHSRLMVLPS 749  
Chicken RRAFSAYLQHVQLRLMKDVGDQFQNAAWAAKEDEQMELVVHFLKRAASNLQQLSLRMLLPS 753  
Lizard RKAFSAYLHRVQLRLMKEAGDQVHNPAAWAAKEDEQMELVVRFLKRAASNLQQLSLRMLLPS 752  
Pufferfish RKAFSSYLQRVQQRLLAESR-TDAIPAWPDKDNDQMDLVIRFLKRAASNLQQDIQVAFPS 720  
Frog RNAFSCYLQRVQNRQLQTERNPERVQP----KEEQIELVMRFLQRGANLKRSLPLNLP 679  
\* \*\*.\*\*\*::\*\* \*\* : \*::\*::\*\*::\*\*:\*.: \*\*::: : : \*.

Human RRLALLERRRILAHQLGDFIIVYNKETEQMAEKKS KKKVE-----EEEEEDGVNMFNFQ 789  
Mouse RRLALLERRRILAHQLGDFIGVYNKETEQMAEKKS KKKLE-----EEEEEDGVNAESFQ 802  
Chicken RHLGLNDRRRILAHQLGDFIICYNKETEQMIQKRS KKKQE-----EEEE-GVNPEGFQ 805  
Lizard RRLALFDRRRILAHQLGDFIICYNRETQMAQKKLKQKQE-----EEEEGVDPPEGFH 805  
Pufferfish RQLPLQDRRRILSHQLGDFIHCYDQVFALPAKQKQKQETENIVKKQVSDGGLCVNAGVVF 780  
Frog QSVPYLERRHLLAKLLGDFVALYNQETQQMQNSEETQSNE-----ECGVNPDDFE 729  
: : :\*\*\*:\*\*: \*\*:\*: \*:: :... :.. \* \* : \*

Human EFIRQASEAELEEVLTFFYTQKNKSASVFLGTHSKISKNNNN--YSDSGAKGDHPETIMEE 847  
Mouse EFIRQASEAELEEVLTFFYTQKNKSASVFLGTHSKSKNSSS--YSDSGAKGDHPET-IQE 859  
Chicken NFITRASERDLEEVLTFFYTQKNKSASVFLGTNSGTTKPRNTSNQSENQPQGDHPVEMKNT 865  
Lizard EFVIKASESDLEEVLTFFYTHKNKSASVFLGTNPGTSKHSNS--QLENRGK----EVVKEN 859  
Pufferfish EYISAASEAELEEVLTFFYTQKNKSSTVFLGAQGKSVRPKSCR-FSDAEAAVRQPSDRQEA 839  
Frog AFVADASENELEEVLTFFYTQKNKSASVFLGTPNADRRETG---KPPGGPQNRLTCERSV 786  
:: \*\*\* :\*\*\*\*\*:\*\*\*\*:\*\*\*\*: : .

Human VKIKPP-----KQQQTTEIHSKLSRFTTSAEKEAKLVYSNSS----SGPTA 890  
Mouse VKIKQP-----KQQQATEIHADKLSRFTTSSGKEAKLVYTNCS SFC-SPA AV 905  
Chicken KGDQAKSSVADLPVEGRVVRVCKARVKSTLPEKS--TFSLNAEVKLPRCCPPSAASSASGA 923  
Lizard VAEELK-----DDQLKETRLSSNIHFQKQAGVTSSPEDENAPQLSFLSATSSSVPDA 911  
Pufferfish VTTQPEIQAP-----QHRSSFPATIDSADIQQHRSASSATLPLYCLPP----PPPPP 888  
Frog VMSSAP-----SQPSVSKPGYSQGCNVSDGPIIITNSAVN----- 821  
. .

Human TLQKIPNTHLSS-VTTSDLSPGPGCHHSSLSQIP--SAIPSMHPQP-TILLNTVSASASPC 946  
Mouse LLQRLPSSHLSSVITTSALSAGPGHHASLSQIP--PAVPSLPHQP-ALLSPVPDNAPPS 962  
Chicken TFRRSTSSQLPSQPTASGNPQVPGHCSLPTPPSGLRLIHSSSSLPSSQSQSTATDCSSVF 983  
Lizard ILPQSI SFPQLPSHTAASDNAQLPDHLGFLSSGSR LIPSSS-----FQNAAMDSWSST 965  
Pufferfish QLPSYAQSLAKSQFCYSERPPDPAYASSAVVS-----QPLGVSWTP 930  
Frog GLPESCSQRNSSTHVLSNDASLCSTIVGSNGIH-----VSPAKLT 861  
: . \* \* .

Human LHPGAQNI P SPTGLPRCRSGSHTIGPFSSFQSAAH IYSQKLSRPSSAKAG--SCYLNKHH 1004  
Mouse IHSGTQNV S-PAGLPRCRSGSYTIGPFSSFQSAAH IYSQKLSRPSSAKAAG-SCHPHKHH 1020  
Chicken TNPVSSEASSLAGLHRC-SGSYTIGPLSSFQRAAQ IYSQRLSRSPSAKAGLRHRSPSGQR 1042  
Lizard TKNVPQLSSNAGLHRCQSGSFTASPFSSFQSA M Q IYSQRLTRPSSAKAGSRSHSPSRQR 1025  
Pufferfish VSTGKNPPNQVLRRIQSFTSSMSCGGASSLPR TMQLYSQKLSRPTSTIHS-FSCSPHESP 989  
Frog VTPGSWAKS-----GSRPHSSSLGTFSSFQSAAQ IYSQKLRPSSTRSECNHVSVHCNY 915  
. . \* : . \*\* : : : \*\* : \* \* . . \*

Human SGI AKTQKEGEDASLYSKRYNQSMVTAELQRLAEKQAARQYSPSSHINLLTQQVTNLNLA 1064  
Mouse SGI AKTQKEGEDVSLN-RRYNQSLVTAELQRLAEKQAARQYSPASHISLLTQQVTNLNLA 1079  
Chicken VSSIMMNKGTEDAPSLGKRYSPSMVAEELQQLAEKQAACQYSPSHISLLTQQLTSLNLA 1102  
Lizard SAFARVTKDGEEC----KRF SHGVIAEELHRLAEKQATRQYCPSSHINLLTQQLTNLNLM 1081  
Pufferfish RGATPTFKELHPRPEP-TQSNQQAFLSALQK LADKQAARRYASSSHINLLTHHLTQMNLA 1048  
Frog PSLCANCTALNIP-----EARNAFSCYLQRVQNR LQTERNPERVQPEEEQILTSMN I K 969  
. . . . \* : : : : : : : : \* : \* :

Human TGIINRSSASAPPTLRPIISP SG--PTWSTQSDPQAPENHSSSPGSRSLQTGGFAWEGEV 1122  
Mouse SSVINRSSASTPPTLRPVISP SG--PTWSIQPDLHASETHSSPPGSRSLQTGGFAWEGEV 1137  
Chicken SGAVSKGNAAVPPSYRSALNRKG--PLCTVQSDTLTDDRRCISSAVRAPESDRFAWEGEM 1160  
Lizard NGAVSRVNTTS--SYRPSLNPGG--SFWAFQNTV I I SNHDKPMQEMALETDRFAWEGDA 1137  
Pufferfish NRMLSRDGFALNPPVQRTAAPAAQRPEWAGQLMLY GDRVHVCLPTNRPQKDRDDAFKQGT 1108  
Frog DGAFGSGSFRH----CSAKSFCG-----RAVHAGTETVESITRDIQRRRS AWESDQ 1016  
. . . . : \* : : :

Human ENNVYSQATGVVPQHKYHP-TAGSYQLQFALQQLQLEQQKLSRQLLDQSRARHQAI FGSQT 1181  
Mouse ENNAYSKT TGVPVQHKYHP-TAGSYQLHFALQQLQLEQQKLSRQLLDQSRARHQAI FGSQT 1196  
Chicken ENNVYGK VTRSPLAHP-----NYQLNLAVQQLQQLQKLSRQLLEQS QARHQALFASYS 1213  
Lizard ENSLHSKLIGSQPLHPKASSSTGSYQLHFALQQLQQLQKLSRQLLDQSRARHQALFANFP 1197  
Pufferfish QS-PYSLLTPMTPQQIKPP-APGSDQLQSAIKK LQQQLRSRQFLDQSHRQQALF---- 1162  
Frog ESGTFSFSSDVPLQHQ-----PDQM QYSAKGGQHPDSAI I SLPNQTCTLLPTPPVSHK 1069  
: . . : \* : : : : . : : \* : :

Human LPNSNLWTMNGAGCRISSATASGQKPTTLPQKV VPPPSSCASLVPKPPPNEHQ-VLRR A 1240  
Mouse LPNSSLWTMNGPGCRISSAT TGGQKPN TLPQKV VAPPNS-STLVSKPASNHKQ-VLRKP 1254  
Chicken QSSTSHVPMSPGSGAHTTSSATSSIQKAASLHKVMPSQCTPSQLVPKPPANHRQAVVRKT 1273  
Lizard TSSISSITLSSGSGARRTSSAISSSQKASTLHKVMSSQSASSHLIPKPPASHRQTVIRKV 1257  
Pufferfish -----  
Frog QSAARTLSATR-----LVRVAPVEQHG----TP 1093

Human TSQKAS-KGSSAEGQLNGLQSSLN-PAAFVPIT SSTDPAHTKI----- 1281  
Mouse ASQRAS-KGSSAEGQLNGLQSSLN-PAAFMPITNSTGSLEAPQVIFARSKPLPTQSGALA 1312  
Chicken AAQRIS-KVSSVERQLNGFQNSLRGAASCELGSNSTASACREGLALNTRRNPE SCFQVWG 1332  
Lizard ASQRISNRAISMEGQMNGFQNSLDSATSCEPLTNSTGEAKIKK----- 1300  
Pufferfish -----  
Frog TSTIVSDFGTPSQGSMEATQI IFARARPSAPKIDIKGQRK----- 1133

Human -----  
Mouse TVIGQRKSKSVKSGTI 1328  
Chicken KGKKQQ----- 1338  
Lizard -----  
Pufferfish -----  
Frog -----

**Figure S2.** Amino acid sequence alignment of TTLL5 orthologs from all branches of the vertebrate animal kingdom. Conservation of the p.Glu543 residue (highlighted in purple) that is mutated in subjects CD3, CD4 and CD5 is observed despite some sequence divergence elsewhere. The alignment was performed with ClustalW2 (EMBL-EBI, Hinxton, UK) using appropriate Ensembl transcripts

**Table S1.** Clinical and genetic findings from the 28 cases that were selected for exome sequencing

| Family ID     | Age tested, sex | Likely disease-causing gene<br>(exome sequencing result) | Electrophysiological diagnosis    | Genetic testing prior exome sequencing                                         | Family history                                     |
|---------------|-----------------|----------------------------------------------------------|-----------------------------------|--------------------------------------------------------------------------------|----------------------------------------------------|
| gc18728 (CD1) | 38,M            | <i>TLL5</i><br>p.[(Glu529fs)];[(Glu529fs)].              | CD                                | <i>ABCA4</i> microarray.                                                       | No other affected; consanguinity.                  |
| gc19552 (CD2) | 45,M            | <i>TLL5</i><br>p.[(Leu134fs);(Trp1118*)].                | CD                                | <i>ABCA4</i> microarray.                                                       | No other affected.                                 |
| gc17090       | 18,F            | Not known.                                               | Not available<br>(clinically MD). | None.                                                                          | Sister affected.                                   |
| gc15017       | 18,M            | <i>ABCA4</i><br>p.[(Gly1961Glu);(Asp295fs)].             | MD                                | None.                                                                          | Brother affected.                                  |
| gc19458       | 24,F            | <i>CRX</i><br>p.[(Arg43Cys)];[=].                        | MD                                | None.                                                                          | No other affected.                                 |
| gc17004       | 29,F            | Not known.                                               | MD                                | <i>ABCA4</i> microarray.                                                       | No other affected.                                 |
| gc17898       | 31,F            | <i>PROM1</i><br>p.[(Arg373Cys)];[=].                     | CRD                               | <i>ABCA4</i> microarray;<br><i>PRPH2</i> all exons.                            | Children & paternal uncle affected; consanguinity. |
| gc15235       | 32,F            | Not known.                                               | MD                                | <i>ABCA4</i> microarray;<br><i>PRPH2</i> all exons.                            | Two affected siblings.                             |
| gc19146       | 34,M            | Not known.                                               | CRD                               | <i>ABCA4</i> microarray.                                                       | No other affected.                                 |
| gc17967       | 39,M            | Not known.                                               | CRD                               | None.                                                                          | No other affected; consanguinity.                  |
| gc17988       | 43,M            | <i>RPGR</i><br>p.[(Glu1060fs)];[0].                      | CRD                               | <i>GUCA1A</i> all exons.                                                       | No other affected.                                 |
| gc4728        | 45,M            | Not known.                                               | MD                                | <i>ABCA4</i> microarray.                                                       | No other affected.                                 |
| gc16362       | 45,M            | <i>ABCA4</i><br>p.[(Arg1843Gly)];[?].                    | MD                                | None.                                                                          | No other affected.                                 |
| gc19964       | 46,M            | Not known.                                               | MD                                | <i>PRPH2</i> all exons.                                                        | No other affected.                                 |
| gc19080       | 46,M            | <i>RPGR</i><br>p.[(Lys1106fs)];[0].                      | CD                                | None.                                                                          | No other affected.                                 |
| gc16258       | 47,M            | Not known.                                               | MD                                | <i>ABCA4</i> microarray.                                                       | No other affected.                                 |
| gc5342        | 47,F            | Not known.                                               | MD                                | None.                                                                          | No other affected.                                 |
| gc17836       | 49,M            | Not known.                                               | CD                                | None.                                                                          | Sister affected; consanguinity.                    |
| gc19457       | 50,M            | Not known.                                               | RCD                               | None.                                                                          | No other affected.                                 |
| gc18729       | 53,M            | <i>ABCA4</i><br>p.[(Gly1961Glu)];[?].                    | CD                                | <i>ADAM9</i> all exons;<br><i>RPGR</i> exon ORF15.                             | No other affected.                                 |
| gc16711       | 53,M            | <i>CRX</i><br>p.[(Arg91Lys)];[=].                        | CRD                               | <i>RS1</i> all exons.                                                          | No other affected.                                 |
| gc16174       | 59,M            | Not known.                                               | MD                                | <i>ABCA4</i> microarray;<br><i>PRPH2</i> all exons.                            | No other affected.                                 |
| gc18250       | 18,M            | <i>CDH3</i><br>p.[(Asp523fs)];[(Asp523fs)].              | MD                                | None.                                                                          | No other affected; consanguinity.                  |
| gc17784       | 19,M            | <i>ABCA4</i><br>p.[(Asp1734Thr)];[?].                    | RCD                               | <i>RS1</i> all exons;<br>genotyping array.                                     | No other affected; consanguinity.                  |
| gc19018       | 50,F            | Not known.                                               | CRD                               | <i>RIMS1</i> exons 14-15;<br><i>GUCY2D</i> exon 13;<br><i>PRPH2</i> all exons. | Affected sister, father & paternal grandfather.    |
| gc18280       | 56,F            | <i>CRX</i><br>p.[(Tyr258*)];[=].                         | MD                                | <i>PRPH2</i> all exons.                                                        | Affected sister & son.                             |
| gc16966       | 63,M            | Not known.                                               | MD                                | <i>ABCA4</i> microarray;<br><i>PRPH2</i> all exons.                            | No other affected.                                 |
| gc4055        | 74,M            | Not known.                                               | CD                                | All exons of <i>PRPH2</i> ,<br><i>PROM1</i> & <i>RS1</i> .                     | Father affected.                                   |

CD, cone dystrophy; CRD, cone-rod dystrophy; RCD, rod-cone dystrophy; MD, macular dystrophy; *ABCA4* microarray, *ABCA4* APEX microarray (ABCR400 or ABCR600 chip, Asper Ophthalmics, Tartu, Estonia). All genes except *ABCA4* were screened using Sanger sequencing. Individuals with family IDs gc17898, gc19457, gc16711, gc19018 and gc18280 were excluded from the case-control analysis based on ancestry.



**Table S2.** Top five most significant autosomal genes: the total count of non-synonymous and splice altering rare variants was compared between probands with retinal dystrophy and internal controls

|                  | Chromosome | Number of non-synonymous and splice altering variants cases <sup>a</sup> (n = 23) | Number of non-synonymous and splice altering variants in UCL-exomes controls <sup>b</sup> (n = 1,465) | Sequence Kernel Association Test (SKAT) P-value | Binomial P-value |
|------------------|------------|-----------------------------------------------------------------------------------|-------------------------------------------------------------------------------------------------------|-------------------------------------------------|------------------|
| <i>TLL5</i>      | 14         | 9                                                                                 | 50                                                                                                    | 0.00069                                         | 4.46e-7          |
| <i>KRTAP10-8</i> | 21         | 5                                                                                 | 11                                                                                                    | 0.0036                                          | 1.54e-6          |
| <i>TPR</i>       | 1          | 9                                                                                 | 67                                                                                                    | 2.12e-4                                         | 2.73e-5          |
| <i>RTTN</i>      | 18         | 7                                                                                 | 37                                                                                                    | 1.21e-4                                         | 3.08e-5          |
| <i>MUC16</i>     | 19         | 21                                                                                | 351                                                                                                   | 6.25e-4                                         | 4.09e-5          |

<sup>a</sup>Case group: 28 probands with [i] a retinal dystrophy with early cone photoreceptor involvement, [ii] an unknown molecular diagnosis after previous genetic screening or no previous genetic testing, [iii] absence of fundoscopic and fundus autofluorescence imaging features suggestive of *ABCA4*-retinopathy. Five of these 28 cases were excluded based on ancestry (Figure 2A).

<sup>b</sup>UCL-exomes control group: 1,750 individuals analyzed with using the same sequence variant calling strategy as the 28 retinal dystrophy cases. After [i] inferring ancestry based on the exome sequencing data and using a principal component analysis to exclude samples that did not cluster with the bulk of the UCL-exomes samples, which are predominantly of European origin, [ii] removing all samples with a history of retinal disease and [iii] excluding related control samples, we were left with 1,465 unrelated controls.

Genes are ranked based on the binomial P-value test which tests for equal proportion of non-synonymous and splice altering rare variants between cases and controls, against the alternative of an excess of the same class of variants in cases. To define “rare” variants we utilized two cohorts: a subset of 25% of UCL-exomes controls (366 unrelated control samples, randomly sampled and not included directly in the case-control analysis; minor allele frequency of <0.3%) as well as the NHLBI Exome Sequencing Project dataset (minor allele frequency of <0.1% was used).

**Table S3.** Prioritization of variants identified by exome sequencing in three probands with *TTLL5*-retinopathy

|                                                                                  | subject CD1    | subject CD2    | subject CD3    |
|----------------------------------------------------------------------------------|----------------|----------------|----------------|
| All exonic variants                                                              | 21,111         | 21,742         | 22,783         |
| Total non-synonymous and splice altering rare <sup>a</sup> variants              | 450            | 485            | 716            |
| Homozygous non-synonymous and splice altering rare <sup>a</sup> variants         | 11             | 9              | 47             |
| Homozygous presumed loss-of-function rare <sup>a</sup> variants                  | 3 <sup>b</sup> | 0              | 3 <sup>c</sup> |
| Genes with two heterozygous presumed loss-of-function rare <sup>a</sup> variants | 0              | 1 <sup>d</sup> | 0              |

<sup>a</sup>Rare variants: variants with: [i] minor allele frequency of <0.3% in 366 randomly sampled internal UCL-exomes controls and [ii] minor allele frequency of <0.1% in the ~6500 samples in the NHLBI Exome Sequencing Project dataset.

<sup>b</sup>c.[202G>T];[(202G>T)], p.[(Glu68\*);[(Glu68\*)] in ENST00000449873-*TBX15* [MIM \*604127]; c.[1628\_1631del];[(1628\_1631del)], p.[(543\_544del)];[(543\_544del)] in ENST00000464606-*ZC3HAV1* [MIM \*607312]; c.[1586\_1589delAGAG];[(1586\_1589delAGAG)], p.[(Glu529fs)];[(Glu529fs)] in ENST00000298832-*TTLL5* [MIM \*612268].

<sup>c</sup>c.[321\_322insAC];[(321\_322insAC)], p.[(Thr107fs)];[(Thr107fs)] in ENST00000408995-*FHL2* [MIM 602633]; c.[91G>T];[(91G>T)], p.[(Glu31\*);[(Glu31\*)] in ENST00000377294-*ZKSCAN4* [MIM \*611643] and c.[1627G>T];[(1627G>T)], p.[(Glu543\*);[(Glu543\*)] in ENST00000298832-*TTLL5* [MIM \*612268].

<sup>d</sup>c.[401delT(;);3354G>A], p.[(Leu134fs)(;)(Trp1118\*)] in ENST00000298832-*TTLL5* [MIM \*612268].

Exome sequencing was performed using a solution-phase exome capture (SureSelectXT Human All Exon V5, Agilent, CA, USA) and the Illumina HiSeq2000 sequencer (Illumina, CA, USA). Reads were aligned to the hg19 human reference sequence using Novoalign version 2.07.19 (Novocraft, Selangor, Malaysia). Genome Analysis Tool Kit (GATK) version 2.7.4 and ANNOVAR (2013Nov17 version; Open Bioinformatics, MA, USA) were used for variant calling and annotation of single nucleotide polymorphisms and small insertions/deletions. Filtering of variants and case-control analysis were carried out using R scripts.

Each of these three individuals was born to consanguineous parents. Prior exome sequencing of DNA from subject CD3, homozygosity mapping in samples from subject CD3 and his affected brother (subject CD4) was performed (Human Mapping 50K Array Xba 240, Affymetrix, CA, USA). This had yielded four regions of shared homozygosity that were over 10 cM; *TTLL5* was in the largest shared chromosomal segment.

**Table S4.** Primer sequences and conditions used for *TLL5* mutation screening

| Primer name | Primer sequence        | Primer name | Primer sequence           |
|-------------|------------------------|-------------|---------------------------|
| TLL5_ex2F   | tgtggcatattgaggacat    | TLL5_ex18F  | tgtcttttccttggcactt       |
| TLL5_ex2R   | ggcccagaaagagagcctta   | TLL5_ex18R  | cccctccacttttccaatc       |
| TLL5_ex3F   | gggagatgtgattcccaca    | TLL5_ex19F  | ggtgtgggtggcactttat       |
| TLL5_ex3R   | gggctggggatctgctta     | TLL5_ex19R  | aagagcaaaggccaaaatgt      |
| TLL5_ex4F   | ggtgtaattttccccatc     | TLL5_ex20F  | gagagtgcacatgggtgct       |
| TLL5_ex4R   | ctggtaaagccactccaaaa   | TLL5_ex20R  | aaatgccaaccaatgagac       |
| TLL5_ex5F   | aaccctcccattcctgaac    | TLL5_ex21F  | cataatagaagcatcctcaaaggcc |
| TLL5_ex5R   | ggtgcagtgcagcaagaatca  | TLL5_ex21R  | caaagattgcttcacattgaag    |
| TLL5_ex6F   | cactacagggggacttgagg   | TLL5_ex22F  | ccttttgtctgggtctg         |
| TLL5_ex6R   | tgccagtgtgcccttacata   | TLL5_ex22R  | ccactggccttcagaagta       |
| TLL5_ex7F   | cctcctccctcgtctatt     | TLL5_ex23F  | cattctgcaactttactggg      |
| TLL5_ex7R   | ttcctgccagtaaggcaaac   | TLL5_ex23R  | catgaaaatagcaacataattggc  |
| TLL5_ex8F   | tggttacctggaggaact     | TLL5_ex24F  | agaaaatcactgcgggatg       |
| TLL5_ex8R   | aaggaacctgctcctttct    | TLL5_ex24R  | tactgtccccattctccac       |
| TLL5_ex9F   | cctccgaagtcaagggtgtg   | TLL5_ex25F  | ggctgtgggtgcttcatct       |
| TLL5_ex9R   | agcacagcagttgaggaggt   | TLL5_ex25R  | cccctctttcacccttct        |
| TLL5_ex10F  | gtccatgggtttggagtg     | TLL5_ex26F  | gacatgcctgctctgttca       |
| TLL5_ex10R  | aatggagaagcagcaggaga   | TLL5_ex26R  | gctactggatgcaatgcaa       |
| TLL5_ex11F  | agaaagaattgccgcctc     | TLL5_ex27F  | ggattctaggttatggaacc      |
| TLL5_ex11R  | cagctgtcaactgcaggaa    | TLL5_ex27R  | cttcaaatgcctgtaacag       |
| TLL5_ex12F  | tccctggcacctacattct    | TLL5_ex28F  | tcctcctgagtgctttgt        |
| TLL5_ex12R  | ctcaggggacttctgaccaa   | TLL5_ex28R  | ctagttaggtgcccagagga      |
| TLL5_ex13F  | gcccataagcacagcagaat   | TLL5_ex29F  | ggtttagtgggggagtgaga      |
| TLL5_ex13R  | atggccctagatccaggtt    | TLL5_ex29R  | actccccatgagctgtccaa      |
| TLL5_ex14F  | ttttgccaggattttcc      | TLL5_ex30F  | gctgcactggcaacattaga      |
| TLL5_ex14R  | ggagccaagtgtcgtagaaa   | TLL5_ex30R  | aattttagcccacgctgag       |
| TLL5_ex15F  | gaggggtgtgtgggagagt    | TLL5_ex31F  | aggccccatgctttctgata      |
| TLL5_ex15R  | ctgtgcctgtttctgagca    | TLL5_ex31R  | atgccattgccaatgttt        |
| TLL5_ex16F  | gaattgagctataaatcttag  | TLL5_ex32F  | gagcttccacttagaggtgaac    |
| TLL5_ex16R  | gatagttatgcccaagaatatg | TLL5_ex32R  | ctttatatcatctctgtgcagcag  |
| TLL5_ex17F  | gacaaactcatgtcttacattg |             |                           |
| TLL5_ex17R  | cacaaagtttaggacagtcccc |             |                           |

All primers work at 60°C. Ensembl transcript ID ENST00000298832 was used.

**Table S5.** Presumed loss-of-function variants in *TLL5* identified in the Broad 26K dataset (26,000 exomes) and the internal UCL-exomes control cohort (1,465 unrelated exomes)

| <i>TLL5</i> presumed loss-of-function variants                  |                              |                   | Broad 26K dataset             | UCL-exomes control                  | Cases <sup>a</sup>            |
|-----------------------------------------------------------------|------------------------------|-------------------|-------------------------------|-------------------------------------|-------------------------------|
| Genomic build position (hg19)                                   | Nucleotide                   | Protein           | allele count (52,000 alleles) | cohort allele count (2,930 alleles) |                               |
| 14:76156564                                                     | c.401delT                    | p.Leu134Argfs*45  | 0                             | 0                                   | heterozygous state in CD2     |
| 14:76165584                                                     | c.556delA                    | p.Arg186Glyfs*7   | 1                             | 0                                   | -                             |
| 14:76173403                                                     | c.629dupA                    | p.Tyr210*         | 1                             | 0                                   | -                             |
| 14:76184249                                                     | c.789_793delGTTCA            | p.Gln263Hisfs*19  | 1                             | 0                                   | -                             |
| 14:76200373                                                     | c.1166C>G                    | p.Ser389*         | 2                             | 0                                   | -                             |
| 14:76201609                                                     | c.1258C>T                    | p.Ala420*         | 1                             | 0                                   | -                             |
| 14:76211845                                                     | c.1408C>T                    | p.Arg470*         | 2                             | 0                                   | -                             |
| 14:76211872                                                     | c.1435C>T                    | p.Arg479*         | 1                             | 0                                   | -                             |
| 14:76219296                                                     | c.1548delC                   | p.Asp516fs*3      | 0                             | 1                                   | -                             |
| 14:76230991                                                     | c.1586_1589delAGAG           | p.Glu529Valfs*2   | 0                             | 0                                   | homozygous state in CD1       |
| 14:76231034                                                     | c.1627G>T                    | p.Glu543*         | 0                             | 1                                   | homozygous state in CD3 & CD4 |
| 14:76231034                                                     | c.1627G>A                    | p.Glu543Leu       | 14                            | 0                                   | homozygous state in CD5       |
| 14:76231061                                                     | c.1654C>T                    | p.Arg552*         | 1                             | 1                                   | -                             |
| 14:76232616                                                     | c.1920G>A                    | p.Trp640*         | 3                             | 0                                   | -                             |
| 14:76238090                                                     | c.2029C>T                    | p.Arg677*         | 4                             | 0                                   | -                             |
| 14:76238192                                                     | c.2132_2133insGATA           | p.Met712Ilefs*15  | 1                             | 2                                   | -                             |
| 14:76241952                                                     | c.2264_2265dupTT             | p.Ile756Leufs*29  | 1                             | 0                                   | -                             |
| 14:76243171                                                     | c.2365C>T                    | p.Gln789*         | 1                             | 0                                   | -                             |
| 14:76245995                                                     | c.2466dupT                   | p.Lys823*         | 3                             | 0                                   | -                             |
| 14:76249626                                                     | c.2739C>A                    | p.Cys913*         | 1                             | 0                                   | -                             |
| 14:76249741                                                     | c.2854C>T                    | p.Gln952*         | 1                             | 0                                   | -                             |
| 14:76249777                                                     | c.2890C>T                    | p.Arg964*         | 1                             | 0                                   | -                             |
| 14:76330011                                                     | c.3329delG                   | p.Ser1110Thrfs*13 | 1                             | 0                                   | -                             |
| 14:76330037                                                     | c.3354G>A                    | p.Trp1118*        | 0                             | 0                                   | heterozygous state in CD2     |
| 14:76330140                                                     | c.3457C>T                    | p.Gln1153*        | 1                             | 0                                   | -                             |
| 14:76330187                                                     | c.3504_3517delGAGTCGAGCCCGGC | p.Ser1169Profs*11 | 2                             | 0                                   | -                             |
| 14:76368485                                                     | c.3744dupG                   | p.Ser1249Valfs*15 | 1                             | 0                                   | -                             |
| 14:76368504                                                     | c.3760C>T                    | p.Gln1254*        | 1                             | 0                                   | -                             |
| 14:76420778                                                     | c.3835delA                   | p.Thr1279Leufs*20 | 1                             | 0                                   | -                             |
| <b>Combined frequency of presumed loss-of-function variants</b> |                              |                   | 0.0903% (47 total)            | 0.17% (5 total)                     | -                             |

<sup>a</sup>Case group: 28 probands with [i] a retinal dystrophy with early cone photoreceptor involvement, [ii] an unknown molecular diagnosis after previous genetic screening or no previous genetic testing, [iii] no features of *ABCA4*-retinopathy on fundus autofluorescence imaging.

The cDNA is numbered according to Ensembl transcript ID ENST00000298832. See text for more details on the Broad 26K and UCL-exomes control cohorts.

All exome sequences (UCL-exomes and Broad 26K) were generated using the Illumina technology (HiSeq or GAIIX instruments). UCL-exomes FASTQ files were aligned against the human reference genome hg19 using Novoalign (version 2.07.19). Variants were called using the GATK version 2.7.4. All UCL-exomes samples (cases and controls) and all Broad 26K samples (~28,000 samples overall) were called jointly using the GATK UnifiedGenotyper module, following BAM file reduction as implemented by GATK using default options (same 2.7.4 release). We used the Illumina TruSeq target region for variant calling, with +/- 100 base-pairs on the side of each target region. We followed the GATK best practices and implemented variant recalibration, with separate models for SNPs and insertions-deletions. We excluded read depth from our recalibration model owing to the large read depth variability generated by the heterogeneous capture kits used in the multiple studies that form UCL-exomes. Variants with PASS filter and the highest level recalibration tranche (VQSRTancheSNP99.00to99.90) were retained. We used a variant Phred quality threshold of 30 and a genotype (i.e. sample based) Phred quality threshold of 20, with the exception of heterozygous call for which we found the error model overly permissive and for which we used a more stringent genotype Phred quality threshold of 40.

---
